# Supplementary material for: UO22+-amino hybrid materials: structural variation and photocatalysis properties
Source: Royal Society of Chemistry journal article supplement (doi:10.1039/c4ce01473a), 2014-10-09
Supplement: c4ce01473a1.pdf [file c4ce01473a1.pdf]

## Supplementary materials

### **UO<sub>2</sub><sup>2+</sup>-amino hybrid materials: Structural variation and photocatalysis properties**

**Xue-Ting Xu<sup>1</sup>, Ya-Nan Hou<sup>1</sup>, Si-Yue Wei<sup>1</sup>, Xiao-Xi Zhang<sup>1</sup>, Feng-Ying Bai<sup>2</sup>, Li-Xian**

**Sun<sup>3</sup>, Zhan Shi<sup>4</sup>, Yong-Heng Xing<sup>1\*</sup>**

<sup>1</sup> College of Chemistry and Chemical engineering, Liaoning Normal University, Huanghe Road 850#, Dalian City, 116029, P.R. China.

<sup>2</sup> College of Life Science, Liaoning Normal University, Dalian 11602, P.R. China

<sup>3</sup> Guangxi Key Laboratory of Information Materials, Guilin University of Electronic Technology, Guilin 541004, P.R. China

<sup>4</sup> State Key Laboratory of Inorganic Synthesis and Preparative Chemistry, College of Chemistry, Jilin University, Changchun 130012, P.R. China

\**e-mail*: [xingyongheng2000@163.com](mailto:xingyongheng2000@163.com) *tel*: 0411-82156987

**Table S1** the selected bond lengths (Å) and angles (°) of complex **1**

|                         |           |                          |           |                                       |           |
|-------------------------|-----------|--------------------------|-----------|---------------------------------------|-----------|
| U2–O1                   | 1.795(14) | U2–O2                    | 1.786(14) | U1–O3                                 | 1.794(13) |
| U1–O4                   | 1.771(14) | U2–O5                    | 2.401(11) | U2 <sup>#1</sup> -O6                  | 2.258(10) |
| U2–O6                   | 2.296(11) | U2–O10                   | 2.492(13) | U2–O6 <sup>#1</sup>                   | 2.258(10) |
| U2–O9 <sup>#1</sup>     | 2.373(15) | U2 <sup>#1</sup> -O9     | 2.373(14) | U1–O5                                 | 2.323(11) |
| U1–O6                   | 2.236(11) | U1–O8                    | 2.373(15) | U1–O7 <sup>#2</sup>                   | 2.479(11) |
| U1–N1 <sup>#2</sup>     | 2.596(15) | U1 <sup>#2</sup> -N1     | 2.596(14) | U1 <sup>#2</sup> -O7                  | 2.479(11) |
| U1–O5–U2                | 106.2(4)  | U1–O6–U2 <sup>#1</sup>   | 138.3(5)  | U1–O6–U2                              | 112.9(4)  |
| U2 <sup>#1</sup> -O6–U2 | 108.4(5)  | C1–O8–U1                 | 139.7(13) | C3–O10–U2                             | 144.8(13) |
| O4–U1–O3                | 174.0(6)  | O4–U1–O6                 | 92.6(6)   | O3–U1–O6                              | 93.3(5)   |
| O4–U1–O5                | 93.6(6)   | O3–U1–O5                 | 89.2(6)   | O6–U1–O5                              | 71.4(4)   |
| O4–U1–O8                | 90.6(7)   | O3–U1–O8                 | 88.6(7)   | O6–U1–O8                              | 88.1(5)   |
| O5–U1–O8                | 159.3(5)  | O4–U1–O7 <sup>#2</sup>   | 89.2(6)   | O3–U1–O7 <sup>#2</sup>                | 86.6(5)   |
| O6–U1–O7 <sup>#2</sup>  | 143.3(4)  | O5–U1–O7 <sup>#2</sup>   | 71.9(4)   | O8–U1–O7 <sup>#2</sup>                | 128.5(5)  |
| O4–U1–N1 <sup>#2</sup>  | 82.5(6)   | O3–U1–N1 <sup>#2</sup>   | 91.7(6)   | O6–U1–N1 <sup>#2</sup>                | 154.4(4)  |
| O5–U1–N1 <sup>#2</sup>  | 133.8(4)  | O8–U1–N1 <sup>#2</sup>   | 66.9(5)   | O7 <sup>#2</sup> -U1–N1 <sup>#2</sup> | 62.1(4)   |
| O2–U2–O1                | 176.3(6)  | O2–U2–O6 <sup>#1</sup>   | 91.8(5)   | O1–U2–O6 <sup>#1</sup>                | 91.4(5)   |
| O2–U2–O6                | 90.7(6)   | O1–U2–O6                 | 92.1(5)   | O6 <sup>#1</sup> -U2–O6               | 71.6(5)   |
| O2–U2–O9 <sup>#1</sup>  | 91.2(8)   | O1–U2–O9 <sup>#1</sup>   | 87.5(8)   | O6 <sup>#1</sup> -U2–O9 <sup>#1</sup> | 80.4(5)   |
| O6–U2–O9 <sup>#1</sup>  | 152.0(5)  | O2–U2–O5                 | 88.8(6)   | O1–U2–O5                              | 89.9(5)   |
| O6 <sup>#1</sup> -U2–O5 | 140.6(4)  | O6–U2–O5                 | 69.0(4)   | O9 <sup>#1</sup> -U2–O5               | 139.0(5)  |
| O2–U2–O10               | 87.2(6)   | O1–U2–O10                | 89.1(6)   | O6 <sup>#1</sup> -U2–O10              | 149.6(4)  |
| O6–U2–O10               | 138.7(4)  | O9 <sup>#1</sup> -U2–O10 | 69.3(5)   | O5–U2–O10                             | 69.7(4)   |
| O2–U2–U2 <sup>#1</sup>  | 91.6(4)   | O1–U2–U2 <sup>#1</sup>   | 92.1(4)   | O9 <sup>#1</sup> -U2–U2 <sup>#1</sup> | 116.5(4)  |
| O5–U2–U2 <sup>#1</sup>  | 104.5(3)  | O10–U2–U2 <sup>#1</sup>  | 174.1(3)  | C4–N1–U1 <sup>#2</sup>                | 119.1(11) |
| C1–O9–U2 <sup>#1</sup>  | 154.2(15) | C3–O7–U1 <sup>#2</sup>   | 128.7(12) |                                       |           |

Symmetry transformation used to generate equivalent atoms :#1:-x,-y+2,-z+2; #2:-x+1/2,-y+3/2,-z+2

**Table S2** the selected bond lengths (Å) and angles (°) of complex **2**

|                         |           |                         |           |                                       |           |
|-------------------------|-----------|-------------------------|-----------|---------------------------------------|-----------|
| U2–O1                   | 1.781(13) | U2–O2                   | 1.778(12) | U1–O3                                 | 1.796(12) |
| U1–O4                   | 1.788(12) | U2–O5                   | 2.336(12) | U2–O5 <sup>#1</sup>                   | 2.373(12) |
| U1–O6                   | 2.463(10) | U2–O6                   | 2.474(11) | U1–O6 <sup>#2</sup>                   | 2.477(10) |
| U2–O7 <sup>#3</sup>     | 2.247(10) | U1–O7                   | 2.270(10) | U1–O7 <sup>#4</sup>                   | 2.292(11) |
| U2–O8                   | 2.474(11) | U1–O9                   | 2.368(12) | U2–O7 <sup>#5</sup>                   | 2.247(10) |
| U2–O5–U2 <sup>#1</sup>  | 115.3(5)  | U1–O6–U2                | 132.2(4)  | U1–O6–U1 <sup>#2</sup>                | 110.2(4)  |
| U2–O6–U1 <sup>#2</sup>  | 98.8(4)   | U2 <sup>#3</sup> -O7–U1 | 141.1(5)  | U2 <sup>#3</sup> -O7–U1 <sup>#4</sup> | 111.8(4)  |
| U1–O7–U1 <sup>#4</sup>  | 107.1(4)  | C1–O8–U2                | 139.8(11) | C1–O9–U1                              | 143.3(12) |
| O4–U1–O3                | 176.5(5)  | O4–U1–O7                | 89.9(4)   | O3–U1–O7                              | 92.7(4)   |
| O4–U1–O7 <sup>#4</sup>  | 92.9(5)   | O3–U1–O7 <sup>#4</sup>  | 90.1(4)   | O7–U1–O7 <sup>#4</sup>                | 70.3(4)   |
| O4–U1–O9                | 93.7(5)   | O3–U1–O9                | 84.5(4)   | O7–U1–O9                              | 79.5(4)   |
| O7 <sup>#4</sup> -U1–O9 | 149.0(4)  | O4–U1–O6                | 83.8(4)   | O3–U1–O6                              | 92.9(4)   |
| O7–U1–O6                | 150.6(4)  | O7 <sup>#4</sup> -U1–O6 | 138.5(3)  | O9–U1–O6                              | 72.3(4)   |

|                                       |          |                         |          |                                       |          |
|---------------------------------------|----------|-------------------------|----------|---------------------------------------|----------|
| O4-U1-O6 <sup>#2</sup>                | 94.8(4)  | O3-U1-O6 <sup>#2</sup>  | 84.7(4)  | O7-U1-O6 <sup>#2</sup>                | 140.6(4) |
| O7 <sup>#4</sup> -U1-O6 <sup>#2</sup> | 70.5(3)  | O9-U1-O6 <sup>#2</sup>  | 138.8(4) | O6-U1-O6 <sup>#2</sup>                | 68.7(4)  |
| O2-U2-O1                              | 175.8(6) | O2-U2-O7 <sup>#5</sup>  | 91.7(5)  | O1-U2-O7 <sup>#5</sup>                | 90.4(5)  |
| O2-U2-O5                              | 88.3(5)  | O1-U2-O5                | 95.7(6)  | O7 <sup>#5</sup> -U2-O5               | 80.6(4)  |
| O2-U2-O5 <sup>#1</sup>                | 89.5(5)  | O1-U2-O5 <sup>#1</sup>  | 90.8(5)  | O7 <sup>#5</sup> -U2-O5 <sup>#1</sup> | 145.2(4) |
| O5-U2-O5 <sup>#1</sup>                | 64.7(5)  | O2-U2-O6                | 84.0(5)  | O1-U2-O6                              | 93.2(5)  |
| O7 <sup>#5</sup> -U2-O6               | 51.7(3)  | O5-U2-O6                | 150.5(4) | O5 <sup>#1</sup> -U2-O6               | 143.3(4) |
| O2-U2-O8                              | 95.3(5)  | O1-U2-O8                | 80.9(5)  | O7 <sup>#5</sup> -U2-O8               | 145.4(4) |
| O5-U2-O8                              | 133.3(4) | O5 <sup>#1</sup> -U2-O8 | 68.8(4)  | O6-U2-O8                              | 75.9(4)  |

Symmetry transformation used to generate equivalent atoms :#1: -x+2,-y+2,-z+1; #2:-x+1,y,-z+1/2 ; #3: x-1,y,z;  
#4 -x,y,-z+1/2; #5 x+1, y, z

**Table S3** the selected bond lengths (Å) and angles (°) of complex **3**

|                         |            |                                       |            |                         |            |
|-------------------------|------------|---------------------------------------|------------|-------------------------|------------|
| U1-O2                   | 1.763(5)   | U1-O1                                 | 1.769(5)   | U1-O3                   | 2.273(6)   |
| U1-O3 <sup>#1</sup>     | 2.291(6)   | U1-O4                                 | 2.468(4)   | U1-O5                   | 2.484(4)   |
| U1-N1                   | 2.612(4)   | U1-N2                                 | 2.654(5)   | C1-N1                   | 1.336(8)   |
| C5-N1                   | 1.348(7)   | C6-N2                                 | 1.355(7)   | C10-N2                  | 1.350(7)   |
| C11-O5                  | 1.244(7)   | C11-O4                                | 1.253(7)   | O3-U1 <sup>#1</sup>     | 2.291(6)   |
| O2-U1-O1                | 174.7(3)   | O2-U1-O3                              | 90.5(4)    | O1-U1-O3                | 94.9(4)    |
| O2-U1-O3 <sup>#1</sup>  | 91.2(4)    | O1-U1-O3 <sup>#1</sup>                | 93.2(4)    | O2-U1-O4                | 90.48(19)  |
| O1-U1-O4                | 86.7(2)    | O3-U1-O4                              | 120.6(16)  | O3 <sup>#1</sup> -U1-O4 | 157.13(17) |
| O2-U1-O5                | 90.2(2)    | O1-U1-O5                              | 91.6(2)    | O3-U1-O5                | 69.04(17)  |
| O3 <sup>#1</sup> -U1-O5 | 105.6(18)  | O4-U1-O5                              | 51.58(15)  | O2-U1-N1                | 96.15(17)  |
| O1-U1-N1                | 82.37(18)  | O3-U1-N1                              | 107.61(17) | O3 <sup>#1</sup> -U1-N1 | 71.19(18)  |
| O4-U1-N1                | 131.24(14) | O5-U1-N1                              | 172.92(17) | O2-U1-N2                | 80.7(2)    |
| O1-U1-N2                | 94.1(2)    | O3-U1-N2                              | 165.0(2)   | O3 <sup>#1</sup> -U1-N2 | 130.79(17) |
| O4-U1-N2                | 71.94(13)  | O5-U1-N2                              | 122.73(14) | N1-U1-N2                | 61.75(14)  |
| O3 <sup>#1</sup> -O3-U1 | 72.4(5)    | O3 <sup>#1</sup> -O3-U1 <sup>#1</sup> | 71.0(5)    | U1-O3-U1 <sup>#1</sup>  | 143.4(3)   |
| C11-O4-U1               | 94.8(3)    | C11-O5-U1                             | 94.3(4)    | C1-N1-C5                | 117.8(5)   |
| C1-N1-U1                | 119.3(4)   | C5-N1-U1                              | 122.6(4)   | C10-N2-C6               | 117.9(5)   |
| C10-N2-U1               | 120.5(4)   | C6-N2-U1                              | 120.5(4)   |                         |            |

Symmetry transformations used to generate equivalent atoms: #1 -x,-y,-z+1

**Table S4** the selected bond lengths (Å) and angles (°) of complex **4**

|          |            |          |            |          |            |
|----------|------------|----------|------------|----------|------------|
| U1-O2    | 1.755(3)   | U1-O1    | 1.760(3)   | U1-O3    | 2.437(3)   |
| U1-O5    | 2.445(3)   | U1-O6    | 2.457(3)   | U1-O4    | 2.472(3)   |
| U1-N1    | 2.632(4)   | U1-N2    | 2.643(4)   |          |            |
| O2-U1-O1 | 179.08(15) | O2-U1-O3 | 89.03(14)  | O1-U1-O3 | 90.26(14)  |
| O2-U1-O5 | 92.23(13)  | O1-U1-O5 | 88.03(13)  | O3-U1-O5 | 67.09(12)  |
| O2-U1-O6 | 83.88(14)  | O1-U1-O6 | 96.97(14)  | O3-U1-O6 | 118.69(11) |
| O5-U1-O6 | 52.55(11)  | O2-U1-O4 | 94.30(14)  | O1-U1-O4 | 84.81(14)  |
| O3-U1-O4 | 52.62(10)  | O5-U1-O4 | 119.12(11) | O6-U1-O4 | 171.24(10) |

|          |            |          |            |          |            |
|----------|------------|----------|------------|----------|------------|
| O2-U1-N1 | 103.57(13) | O1-U1-N1 | 77.10(13)  | O3-U1-N1 | 166.82(12) |
| O5-U1-N1 | 115.46(12) | O6-U1-N1 | 67.36(11)  | O4-U1-N1 | 121.35(11) |
| O2-U1-N2 | 77.47(12)  | O1-U1-N2 | 102.39(12) | O3-U1-N2 | 119.69(12) |
| O5-U1-N2 | 167.14(12) | O6-U1-N2 | 117.77(11) | O4-U1-N2 | 69.95(11)  |

**Table S5** Bond Distances (Å) and Angles (°) of Hydrogen Bonds in Complexes 1-4\*

| D-H...A                      | d (D-H) Å | d (H...A) Å | d (D...A) Å | ∠DHA(°) |
|------------------------------|-----------|-------------|-------------|---------|
| Complex 1                    |           |             |             |         |
| N1-H1A...O3 <sup>#1</sup>    | 0.90      | 2.20        | 3.031(2)    | 153     |
| N2-H2D...O1 <sup>#2</sup>    | 0.86      | 2.00        | 2.820(3)    | 158     |
| C7-H7...O2 <sup>#3</sup>     | 0.93      | 2.28        | 2.998(16)   | 134     |
| Complex 2                    |           |             |             |         |
| N1-H1B...O3 <sup>#4</sup>    | 0.86      | 2.29        | 2.979(18)   | 137     |
| O2W-H2WA...O4 <sup>#5</sup>  | 0.90      | 2.03        | 2.918(16)   | 169     |
| O2W-H2WB...O4 <sup>#6</sup>  | 0.90      | 2.09        | 2.918(16)   | 152     |
| C2-H2B...O1 <sup>#7</sup>    | 0.97      | 2.45        | 3.226(11)   | 137     |
| C2-H2B...O9 <sup>#8</sup>    | 0.97      | 2.39        | 3.192(11)   | 140     |
| O1W-H1WA...N1                | 0.90      | 2.09        | 2.819(19)   | 137     |
| Complex 3                    |           |             |             |         |
| C1-H1...O5 <sup>#9</sup>     | 0.93      | 2.57        | 3.283(2)    | 134     |
| C2-H2...O1 <sup>#10</sup>    | 0.93      | 2.47        | 3.399(2)    | 176     |
| Complex 4                    |           |             |             |         |
| C14-H14C...O2 <sup>#11</sup> | 0.96      | 2.42        | 3.378(18)   | 174     |

\*Symmetry transformation used to generate equivalent atoms: #1:  $x+1/2, y+1/2, z$ ; #2:  $3/2-x, 3/2-y, 1-z$ ; #3:  $3/2-x, 1/2+y, 1/2-z$ ; #4:  $1/2-x, 3/2-y, 1-z$ ; #5:  $x+1, y-1, z$ ; #6:  $1-x, y-1, 1/2-z$ ; #7:  $3/2-x, 1/2-y, -z$ ; #8:  $5/2-x, 1/2-y, -z$ ; #9:  $-x, 1-y, -z$ ; #10:  $x-1/2, 1/2-y, -z$ ; #11:  $x+1/2, 1/2-y, 1/2+z$ .

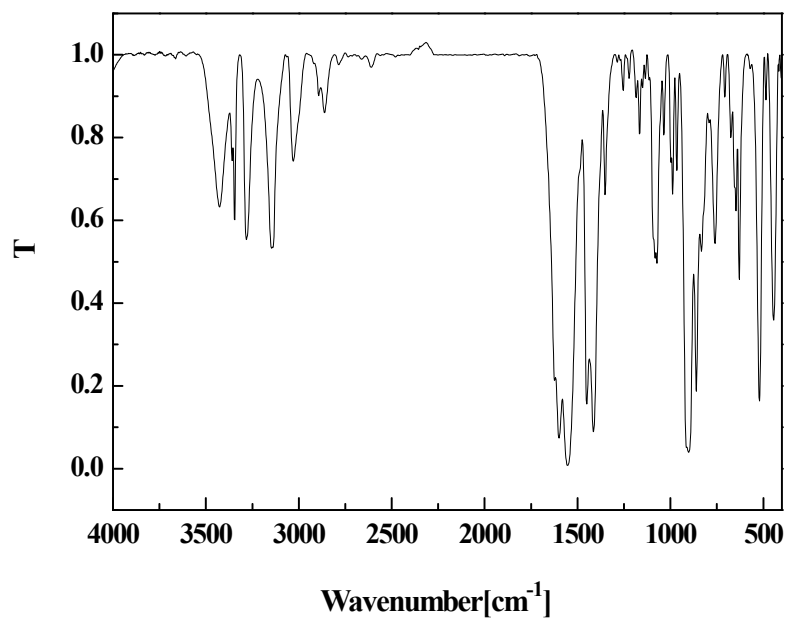

Fig. S1 The IR spectra of complex 1

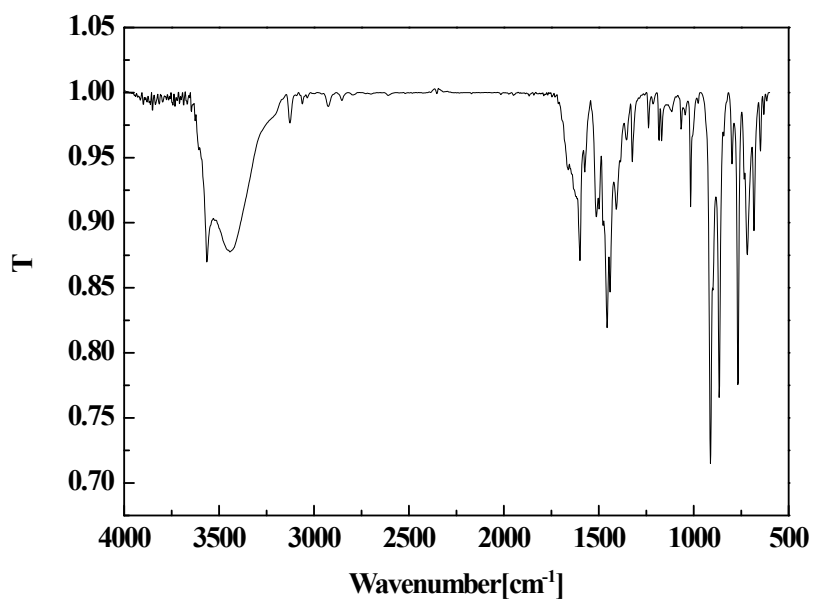

Fig. S2 The IR spectra of complex 2

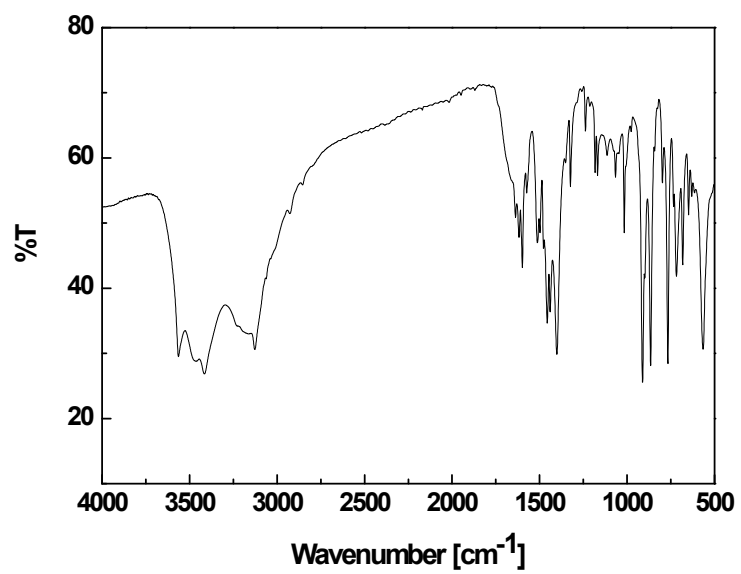

Fig. S3 The IR spectra of complex 3

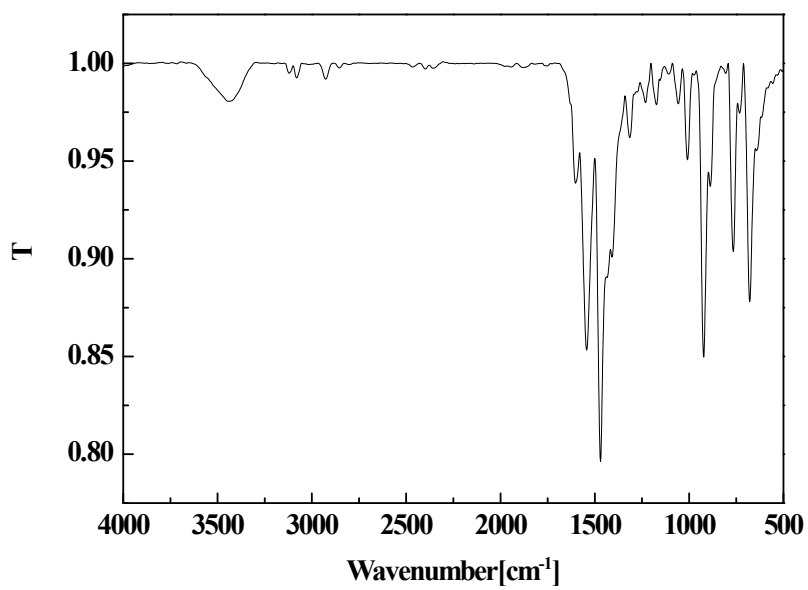

Fig. S4 The IR spectra of complex 4

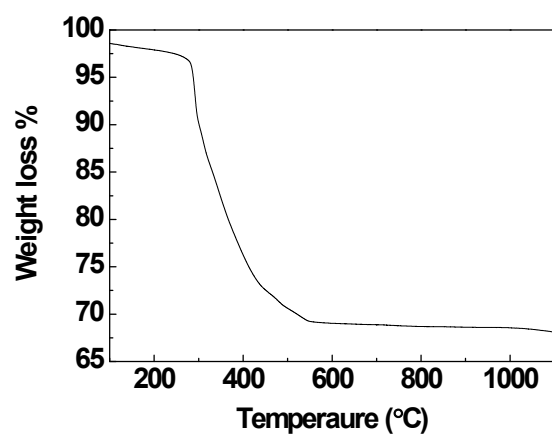

Fig. S5 The TG curve of the uranyl complex 1

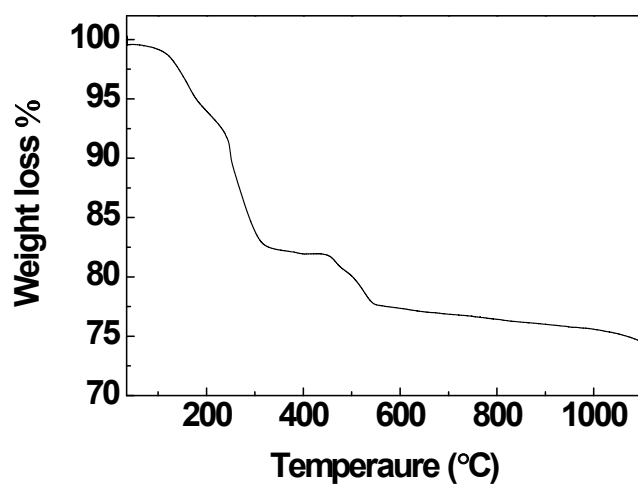

Fig. S6 The TG curve of the uranyl complex 2

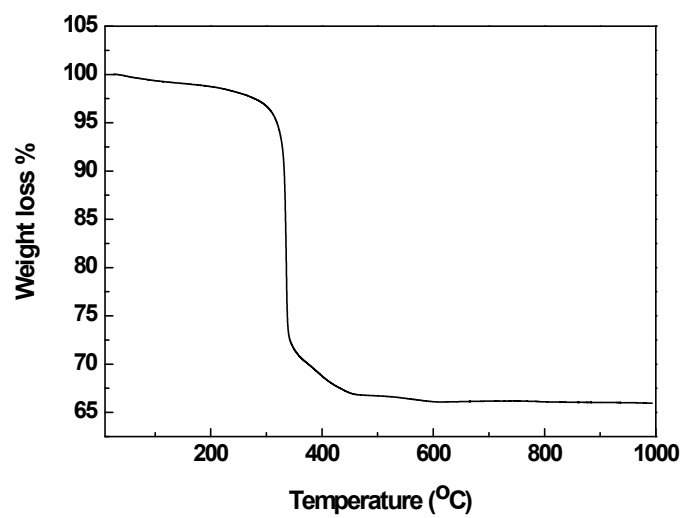

Fig. S7 The TG curve of the uranyl complex 3

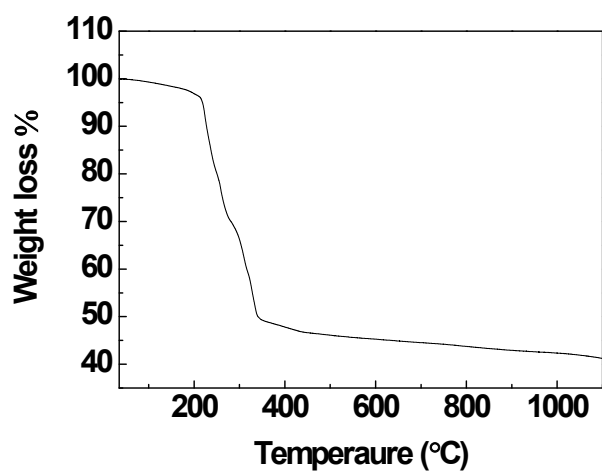

Fig. S8 The TG curve of the uranyl complex 4



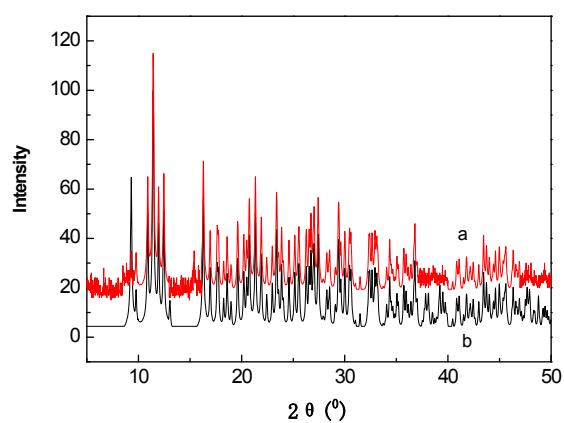

Fig. S9 The experimental PXRD(a) and simulation PXRD(b) of complex 1

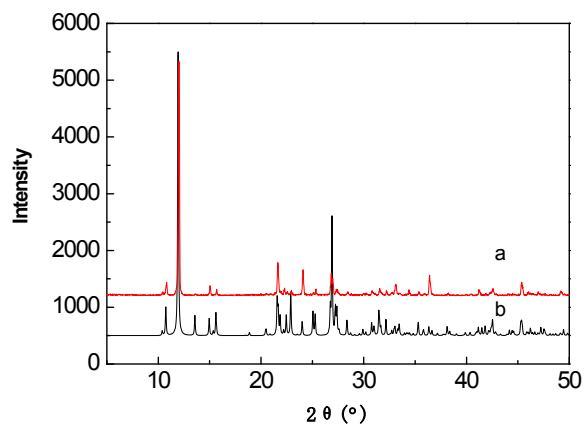

Fig. S10 The experimental PXRD(a) and simulation PXRD(b) of complex 2

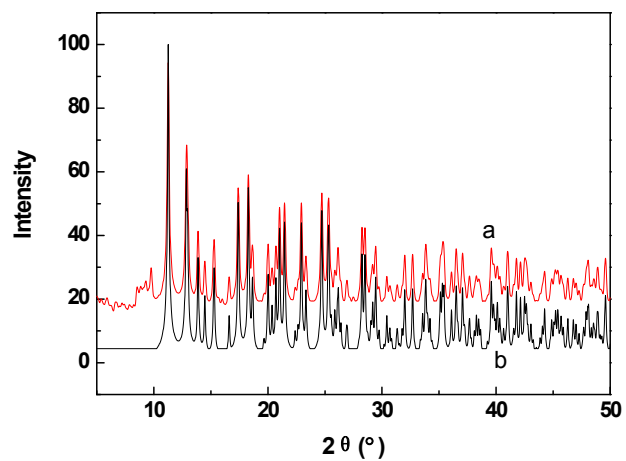

Fig. S11 The experimental PXRD(a) and simulation PXRD(b) of complex 3

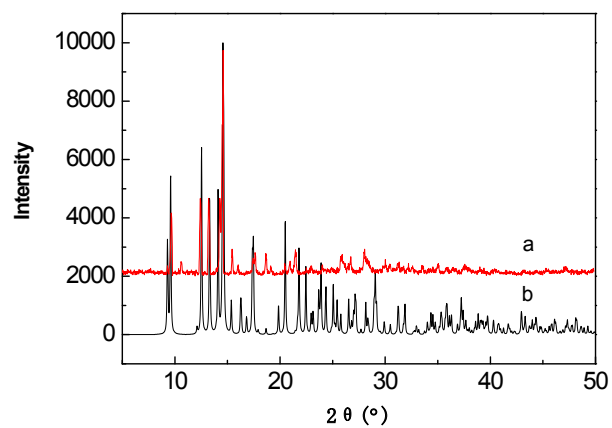

Fig. S12 The experimental PXRD(a) and simulation PXRD(b) of complex 4

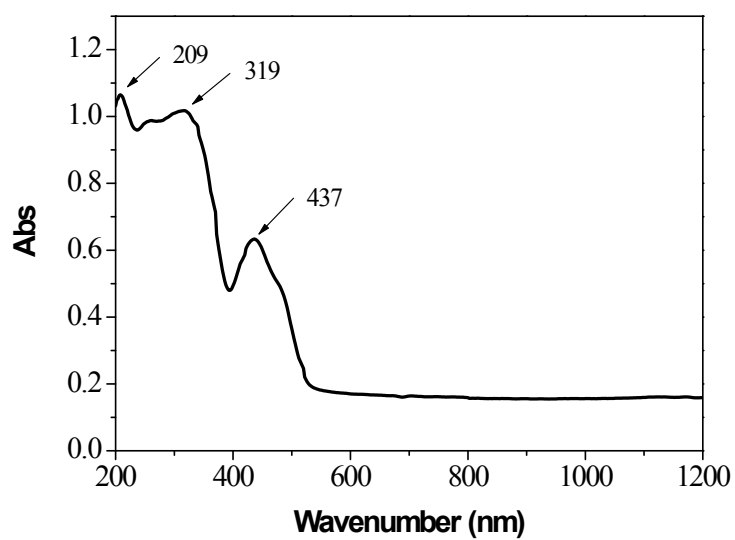

Fig S13 The solid UV-Vis spectra of the uranyl complex 1

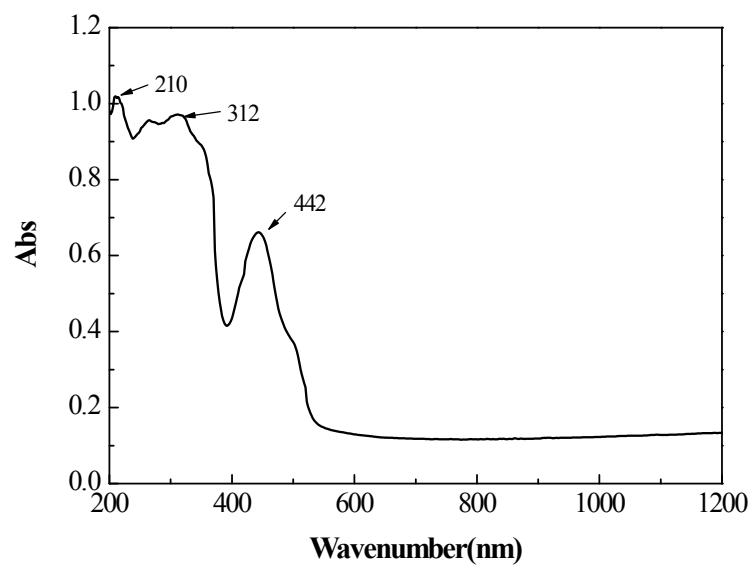

Fig. S14 The solid UV-Vis spectra of the uranyl complex 2

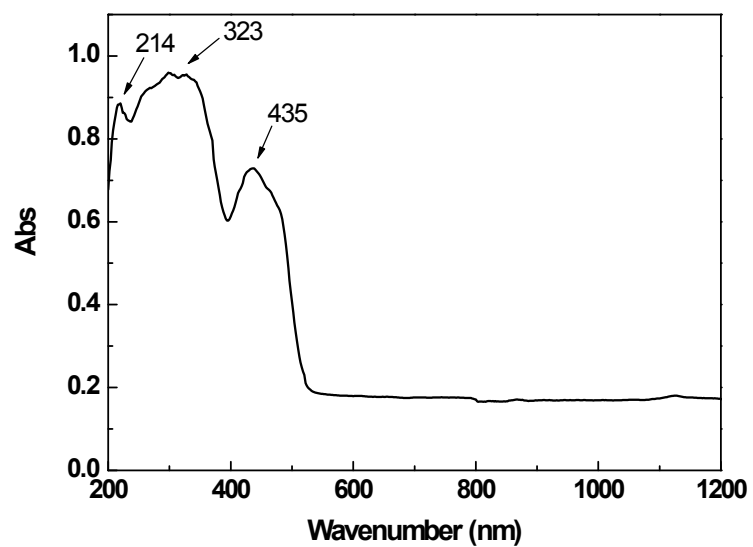

Fig. S15 The solid UV-Vis spectra of the uranyl complex 3

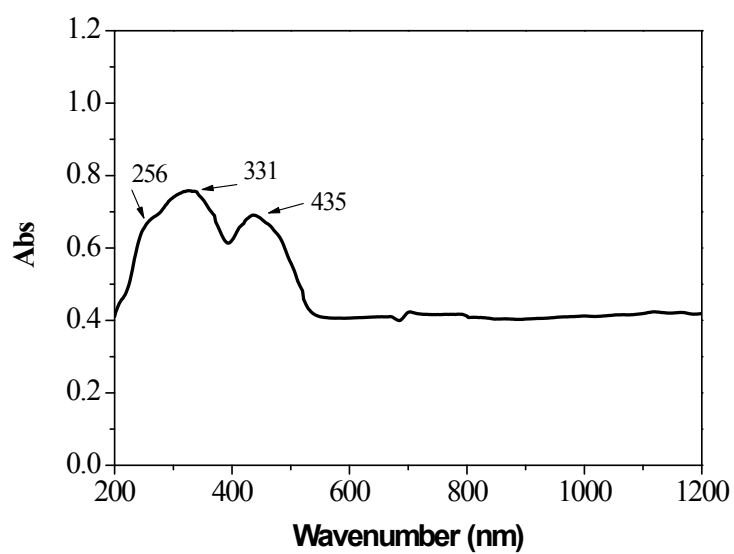

Fig. S16 The solid UV-Vis spectra of the uranyl complex 4

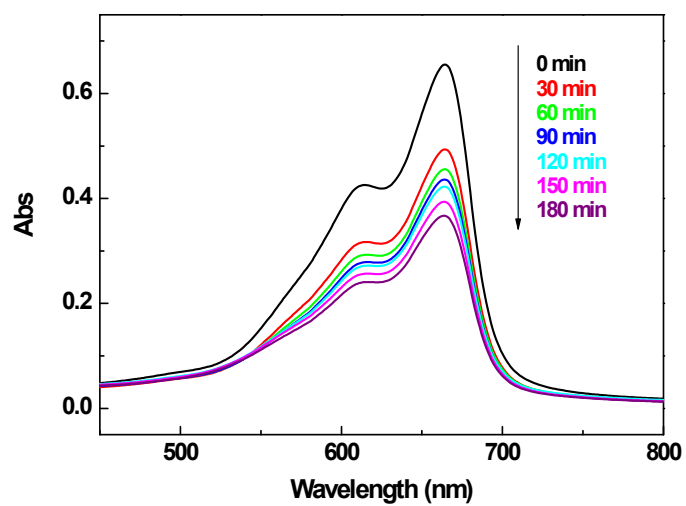

Fig. S17 Absorption spectra of methylene blue solution during the photodegradation reaction under the irradiation of visible light with the use of complex 2

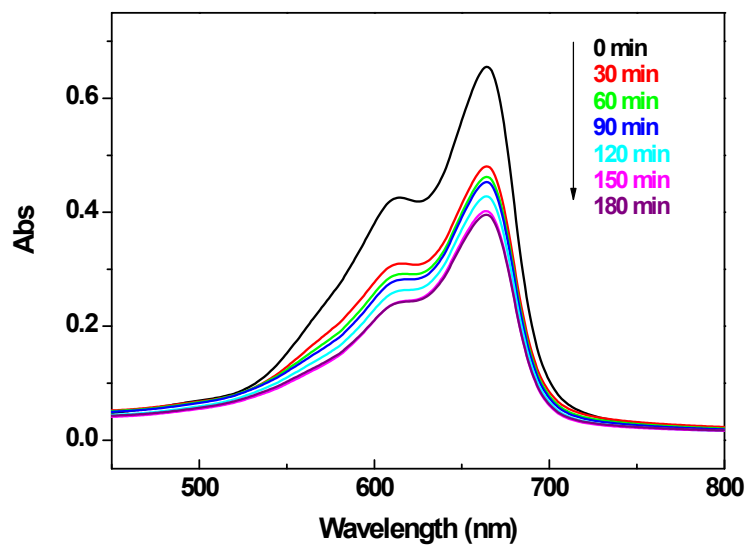

Fig. S18 Absorption spectra of methylene blue solution during the photodegradation reaction under the irradiation of UV light with the use of complex 2

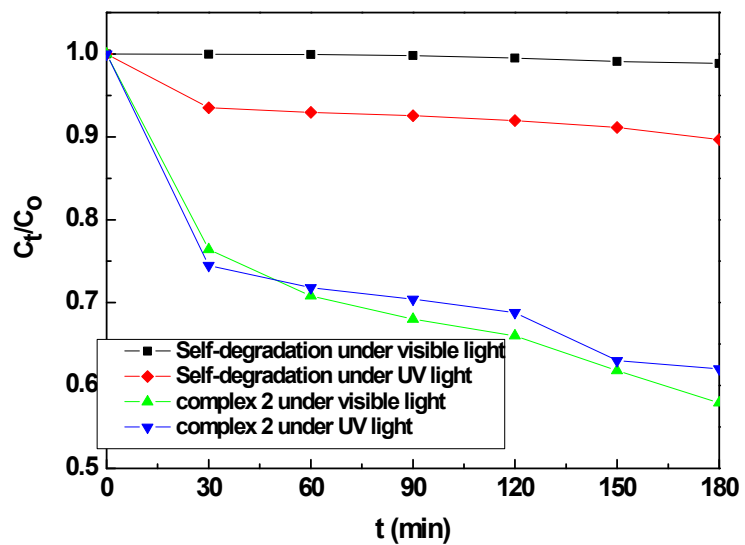

Fig. S19 Self-degradation and photocatalytic decomposition of methylene blue solution with the use of complex 2 under UV and visible light

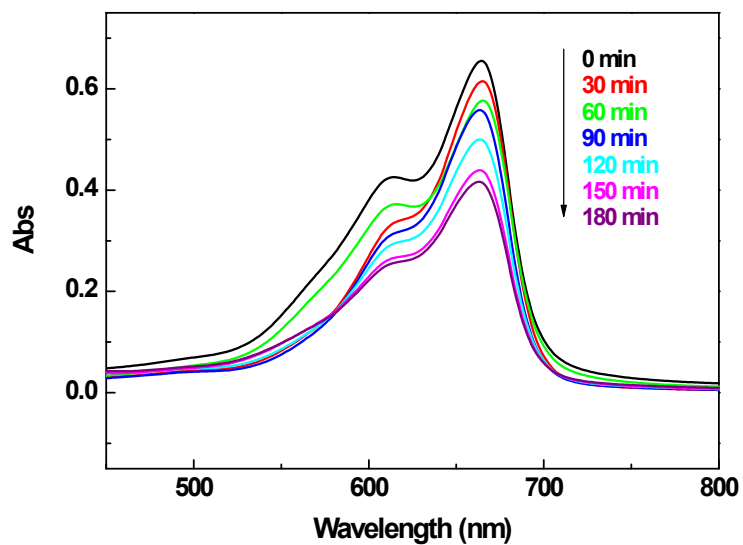

Fig. S20 Absorption spectra of methylene blue solution during the photodegradation reaction under the irradiation of visible light with the use of complex 3

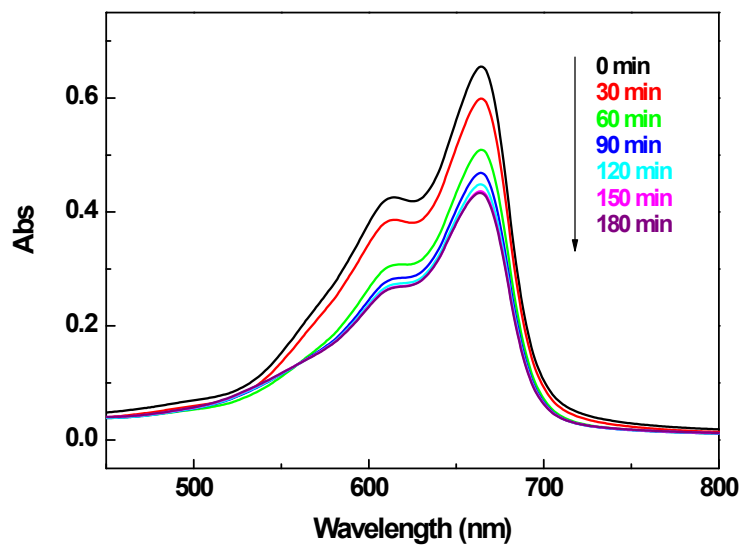

Fig. S21 Absorption spectra of methylene blue solution during the photodegradation reaction under the irradiation of UV light with the use of complex 3

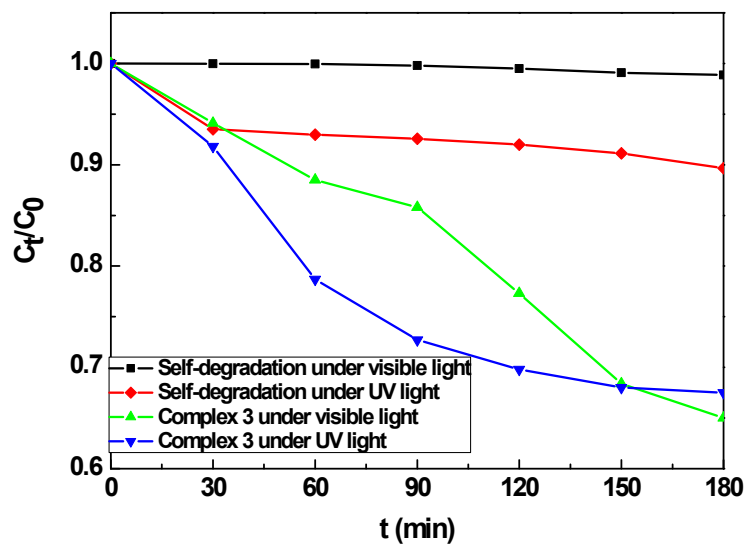

Fig. S22 Self-degradation and photocatalytic decomposition of methylene blue solution with the use of complex 3 under UV and visible light

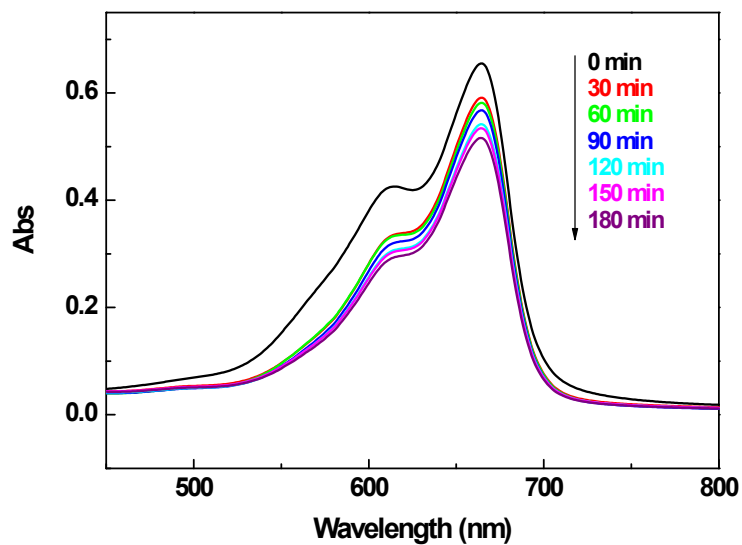

Fig. S23 Absorption spectra of methylene blue solution during the photodegradation reaction under the irradiation of visible light with the use of complex 4

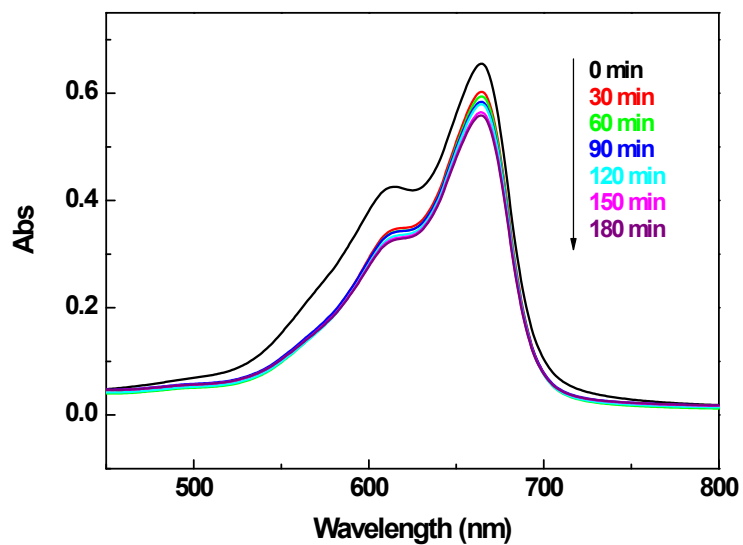

Fig. S24 Absorption spectra of methylene blue solution during the photodegradation reaction under the irradiation of UV light with the use of complex 4

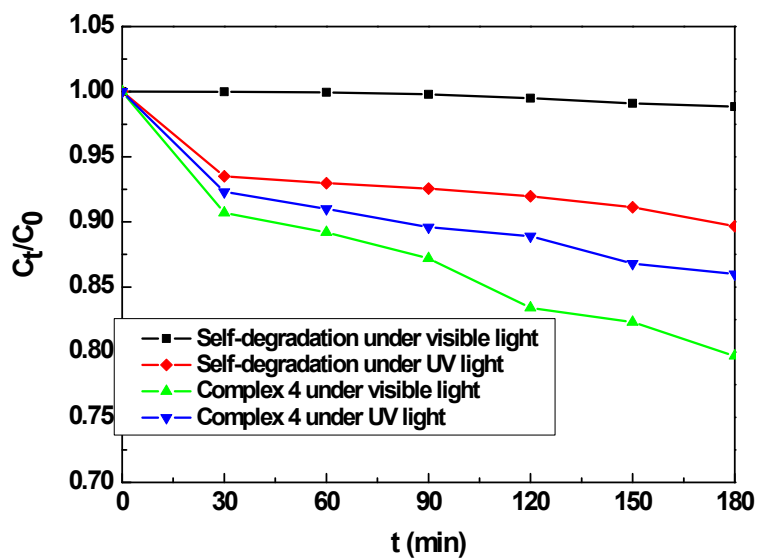

Fig. S25 Self-degradation and photocatalytic decomposition of methylene blue solution with the use of complex 4 under UV and visible light
